# Supplementary material
Source: PubMed Central journal article supplement (PMC2791996)

# Supporting Information

## Ligand Dependence of Binding to Three-Coordinate Fe(II) Complexes

*Karen P. Chiang, Pamela M. Barrett, Feizhi Ding, Jeremy M. Smith, Savariraj Kingsley, William W.*

*Brennessel, Meghan M. Clark, Rene J. Lachicotte, Patrick L. Holland\**

**Figure S1.** ORTEP drawing of the molecular structure of  $L^{tBu,iPr2}Fe(SPh)$ . Thermal ellipsoids at 50% probability. Hydrogen atoms omitted for clarity.

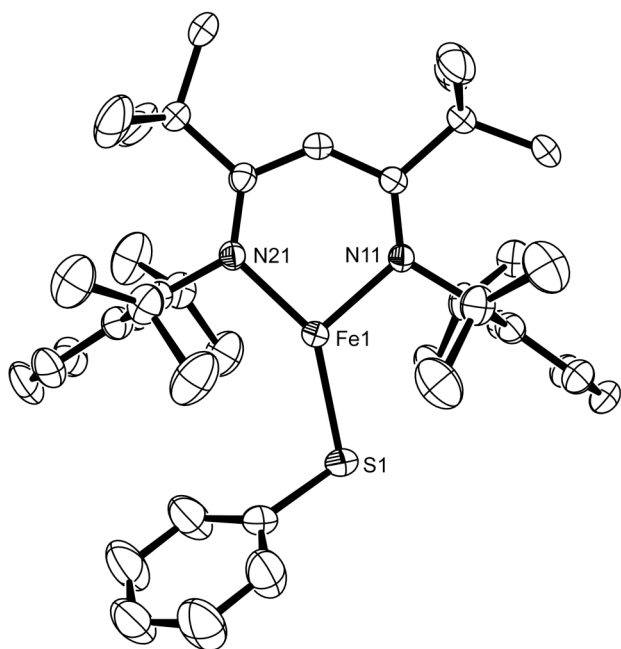

**Figure S2.** ORTEP drawing of the molecular structure of  $L^{tBu,iPr2}Fe(SPhCF_3)$ . Thermal ellipsoids at 50% probability. Hydrogen atoms omitted for clarity.

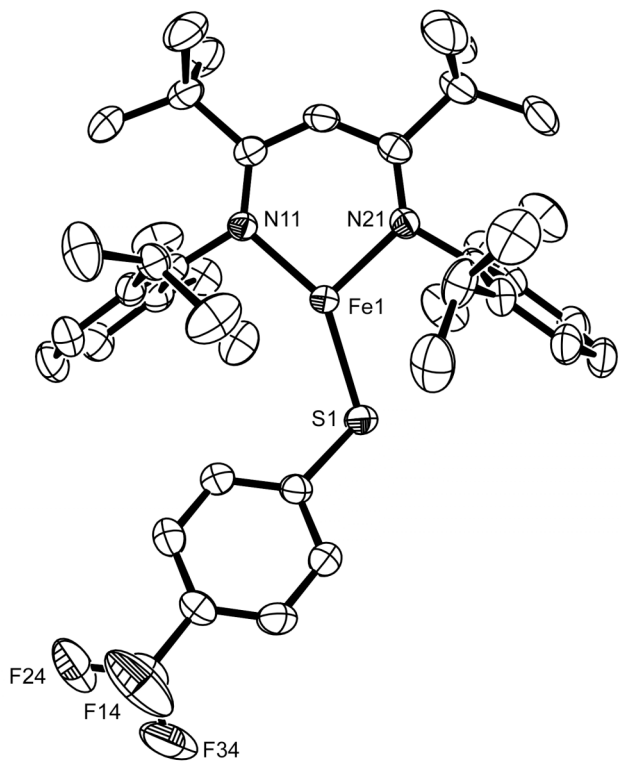

**Figure S3.** UV-Vis plot of  $L^{tBu,iPr2}FeCl$  with specified amount of DMF. Values in the key correspond to the concentration of DMF in that sample. The concentration of  $L^{tBu,iPr2}FeCl$  was 1 mM for each sample.

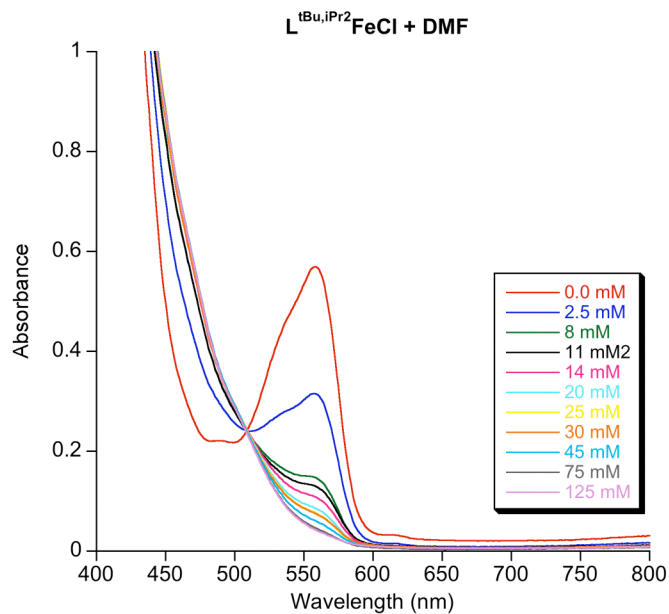

**Figure S4.** UV-Vis plot of  $L^{tBu,iPr2}FeCl$  with specified amount of 2-Picoline. The concentration of  $L^{tBu,iPr2}FeCl$  was 1 mM for each sample.

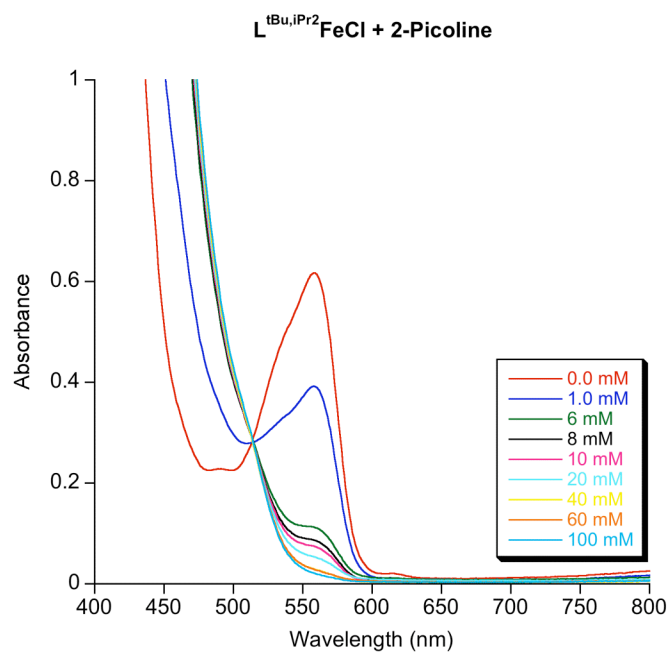

**Figure S5.** UV-Vis plot of  $L^{tBu,iPr_2}Fe(SPh)$  with specified amount of  $CN^tBu$ . The concentration of  $L^{tBu,iPr_2}Fe(SPh)$  was 1 mM for each sample.

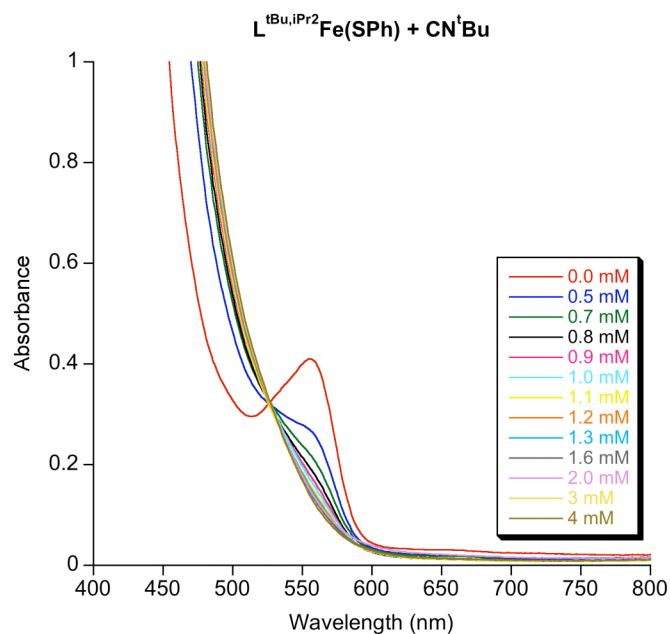

**Figure S6.** Binding curve of  $L^{tBu,iPr_2}FeCl$  and  $PPh_3$  in toluene.  $K_{eq} = 0.7 \pm 0.08$ .

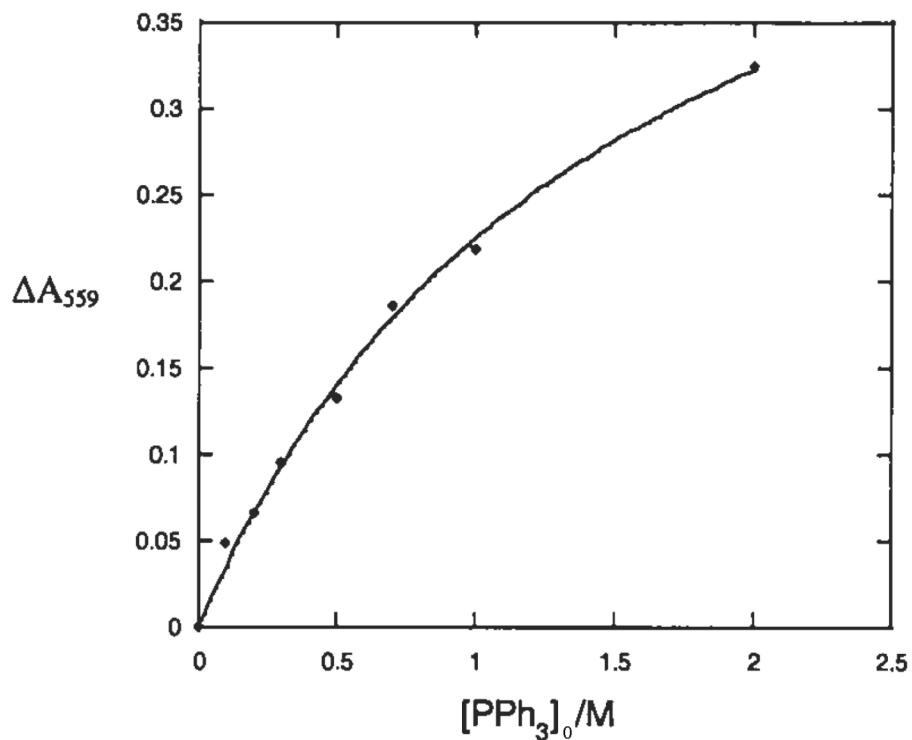

**Figure S7.** Binding curve of  $L^{tBu,iPr2}FeCl$  and THF in toluene.  $K_{eq} = 0.8 \pm 0.01$

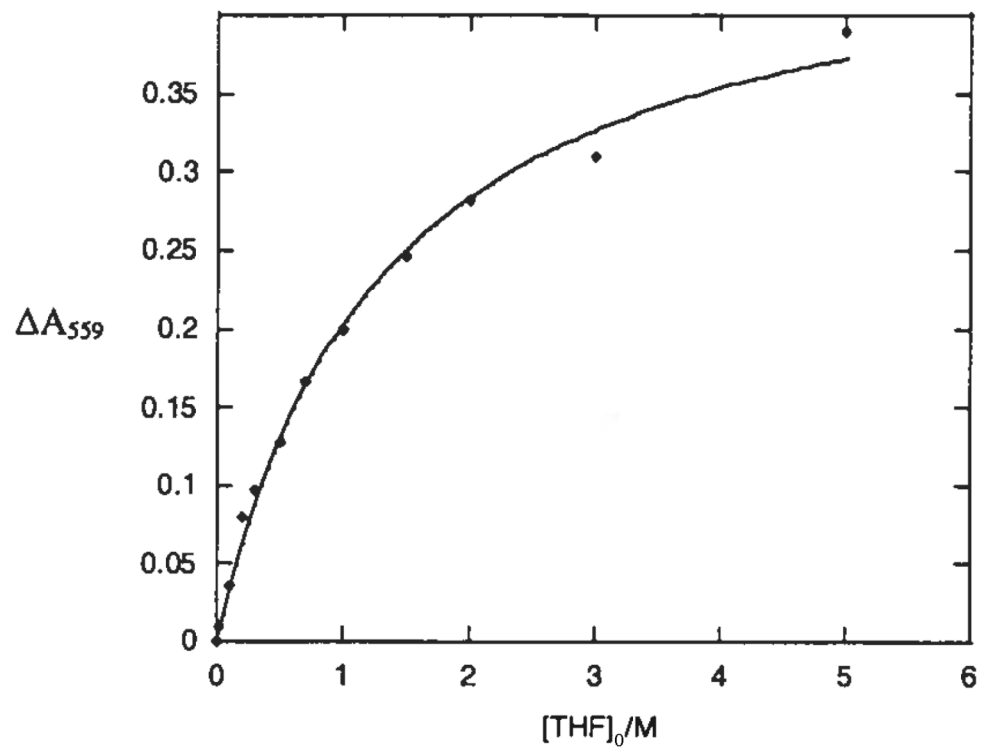

**Figure S8.** Binding curve of  $L^{tBu,iPr2}FeCl$  and MeCN in toluene.  $K_{eq} = 9.8 \pm 0.5$

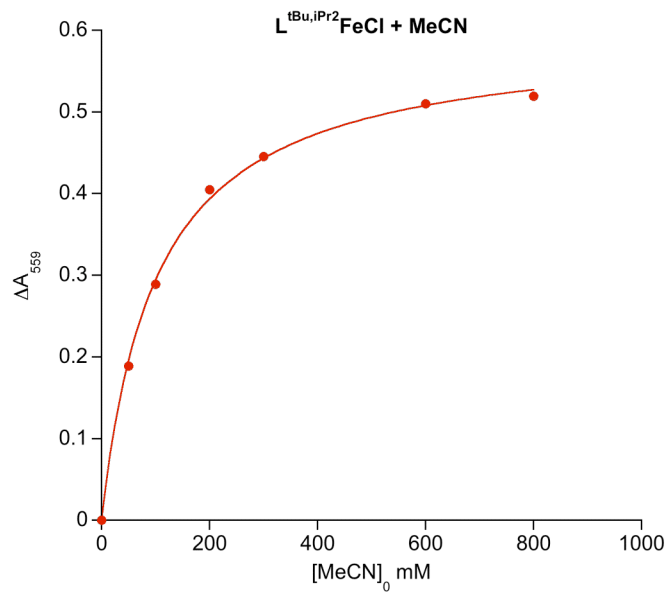

**Figure S9.** Binding curve of  $L^{tBu,iPr2}FeCl$  and DMF in toluene.  $K_{eq} = 390 \pm 20$

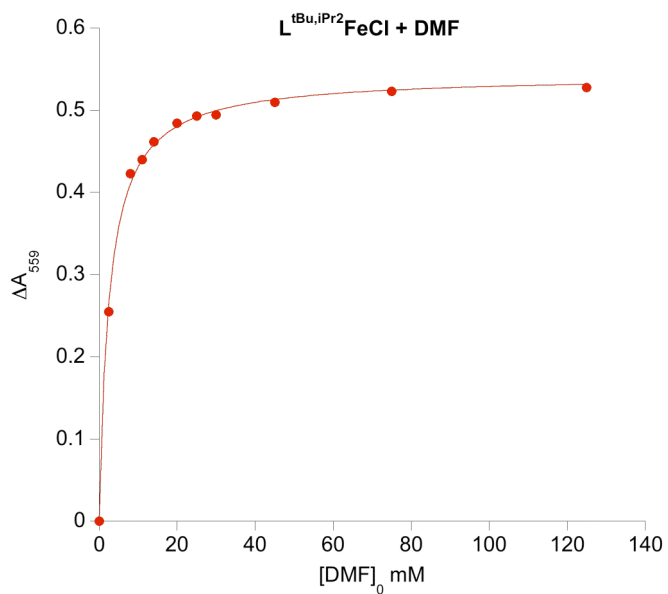

**Figure S10.** Binding curve of  $L^{tBu,iPr2}FeCl$  and 2-picoline in toluene.  $K_{eq} = 660 \pm 50$

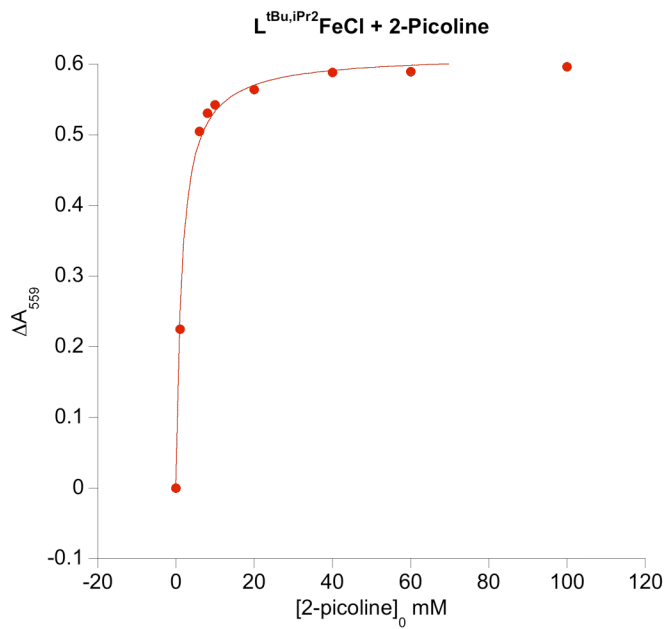

**Figure S11.** Binding curve of  $L^{tBu,iPr2}FeCl$  and pyridine in toluene.  $K_{eq} = 41000 \pm 6000$

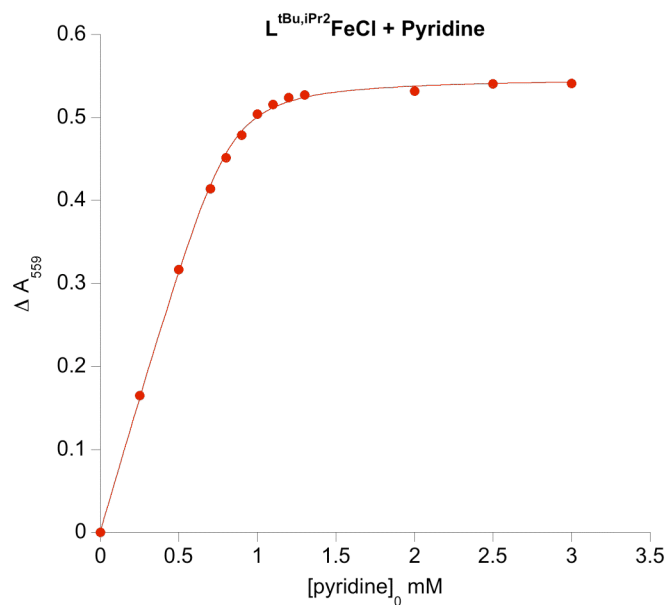

**Figure S12.** Binding curve of  $L^{tBu,iPr2}FeCl$  and  $CN^tBu$  in toluene.  $K_{eq} = 73000 \pm 27000$

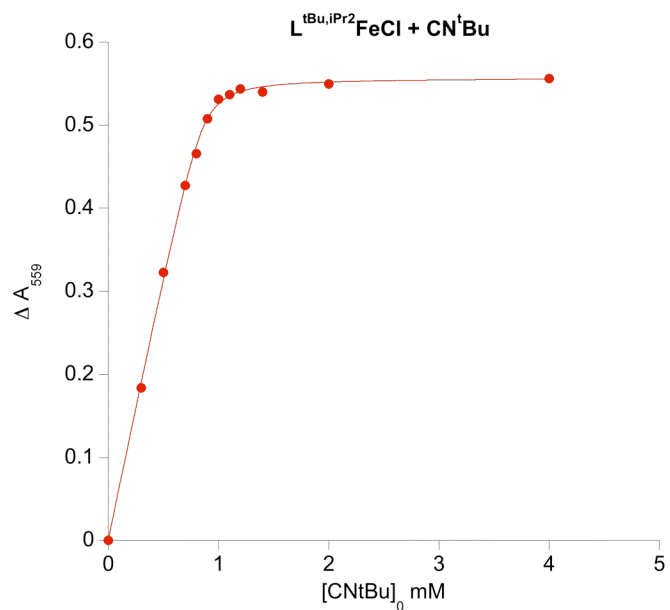

**Figure S13.** Binding curve of  $L^{\text{tBu,iPr}_2}\text{FeSPh}$  and  $\text{PPh}_3$  in toluene.  $K_{\text{eq}} = 1.0 \pm 0.5$

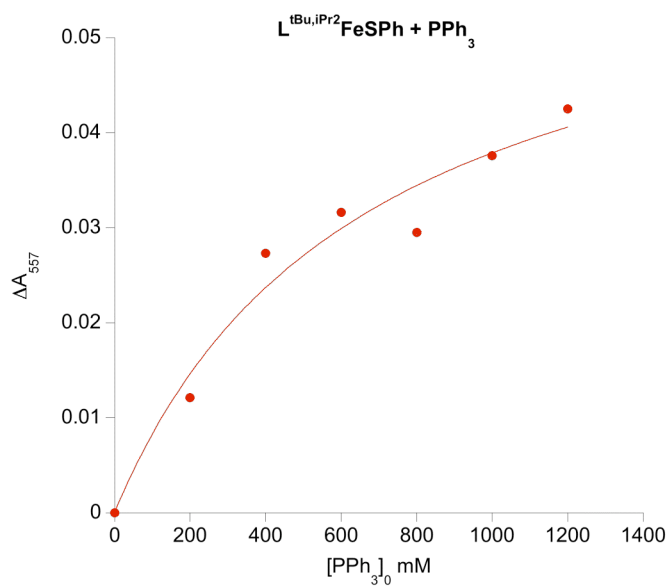

**Figure S14.** Binding curve of  $L^{\text{tBu,iPr}_2}\text{FeSPh}$  and THF in toluene.  $K_{\text{eq}} = 0.15 \pm 0.01$

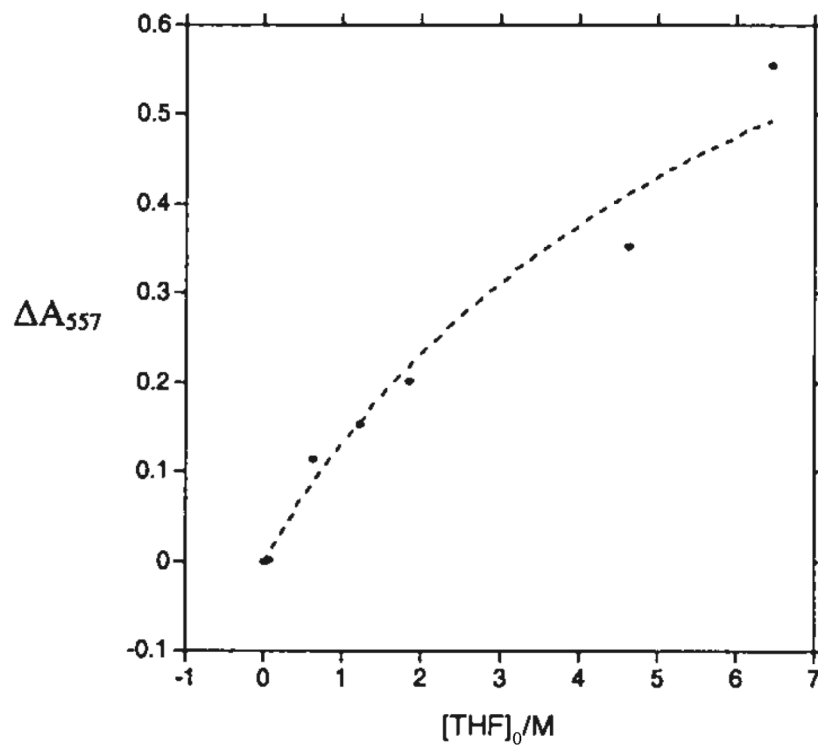



**Figure S15.** Binding curve of  $L^{\text{tBu,iPr}_2}\text{FeSPh}$  and MeCN in toluene.  $K_{\text{eq}} = 5.2 \pm 0.2$

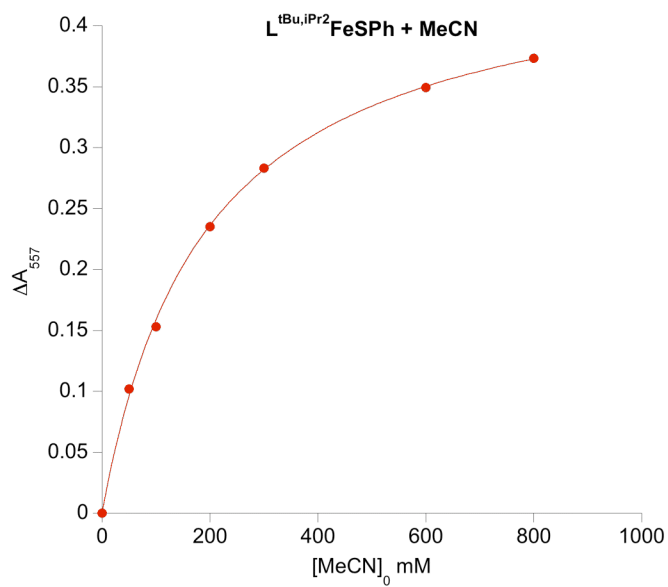

**Figure S16.** Binding curve of  $L^{\text{tBu,iPr}_2}\text{FeSPh}$  and DMF in toluene.  $K_{\text{eq}} = 160 \pm 5$

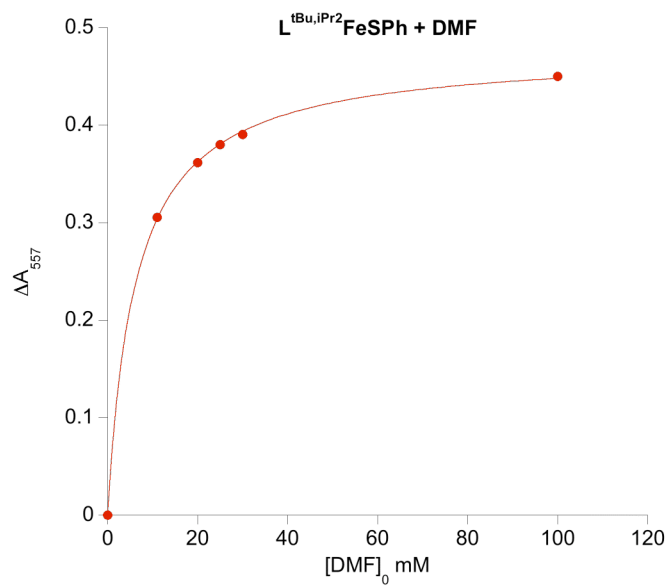

**Figure S17.** Binding curve of  $L^{tBu,iPr2}FeSPh$  and 2-picoline in toluene.  $K_{eq} = 300 \pm 30$

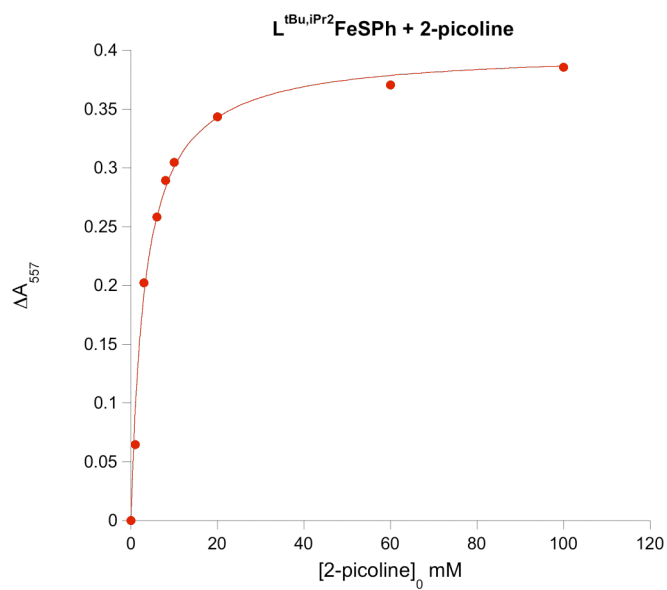

**Figure S18.** Binding curve of  $L^{tBu,iPr2}FeSPh$  and pyridine in toluene.  $K_{eq} = 11000 \pm 2000$

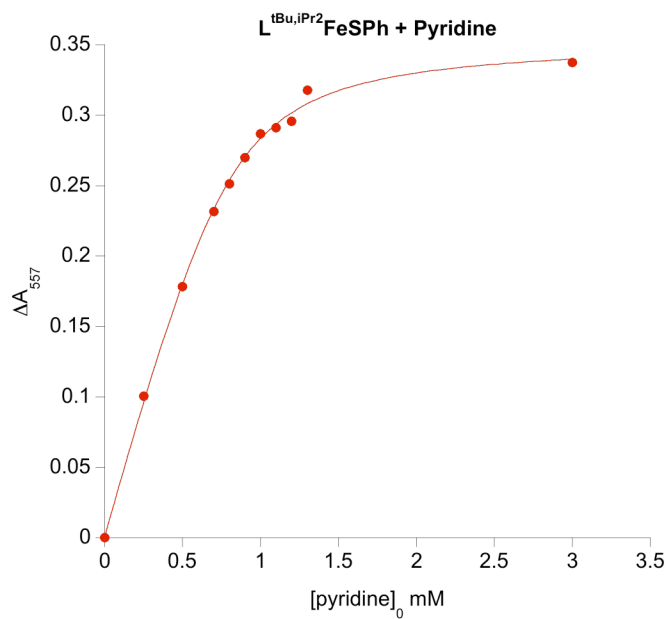

**Figure S19.** Binding curve of  $L^{tBu,iPr_2}Fe(SPhCF_3)$  and MeCN in toluene.  $K_{eq} = 11.7 \pm 0.9$

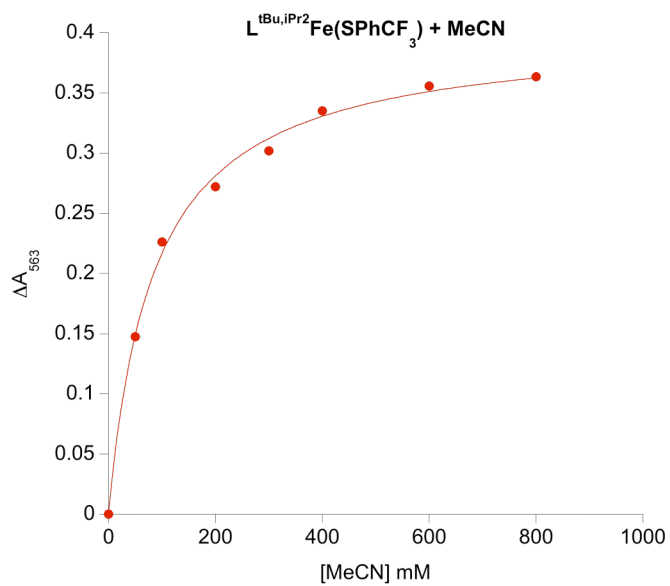

**Figure S20.** Binding curve of  $L^{tBu,iPr_2}Fe(SPhCF_3)$  and DMF in toluene.  $K_{eq} = 230 \pm 10$

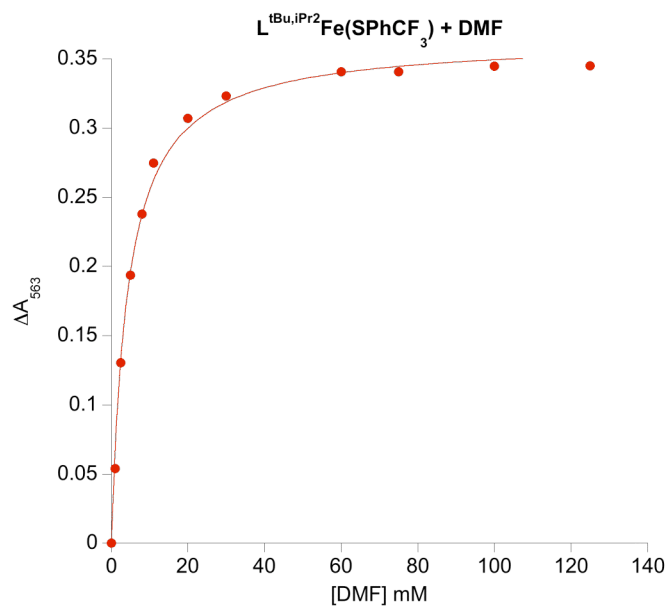

**Figure S21.** Binding curve of  $L^{tBu,iPr2}Fe(OPh)$  and MeCN in toluene.  $K_{eq} = 4.7 \pm 0.4$

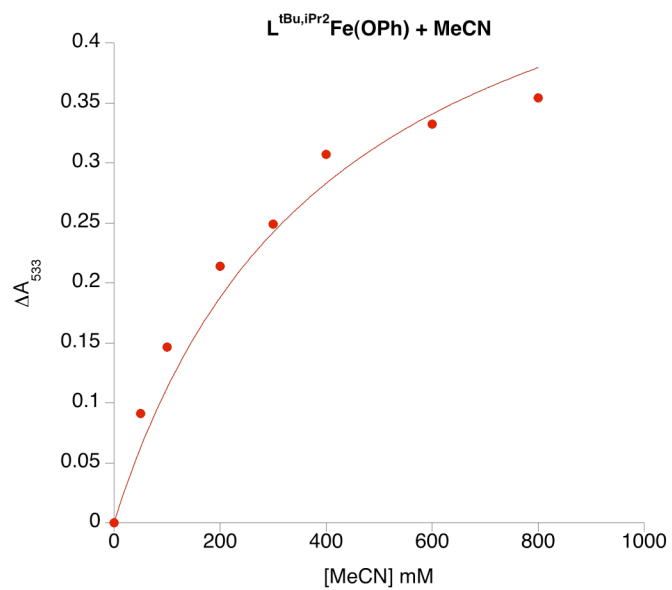

**Figure S22.** Binding curve of  $L^{tBu,iPr2}Fe(OPh)$  and DMF in toluene.  $K_{eq} = 160 \pm 10$

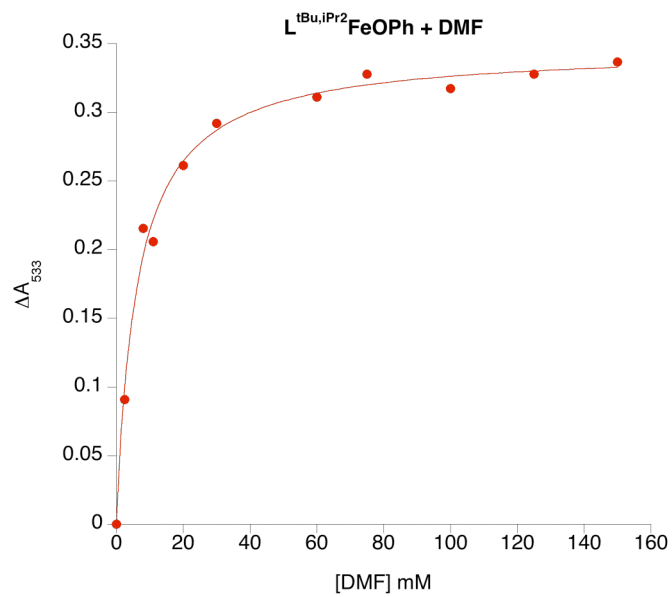

**Figure S23.** Voltammogram of  $L^{\text{tBu,iPr}_2}\text{Fe}(\text{SPh})$  with corresponding  $E_{1/2}$  value of  $-2.41(2)$  V. Potential is referenced to the  $\text{Fc}^+/\text{Fc}$  couple. The sample consisted of 4 mM of  $L^{\text{tBu,iPr}_2}\text{Fe}(\text{SPh})$  in  $\text{Et}_2\text{O}$  with 0.1 M  $\text{NBu}_4\text{BArF}$ .

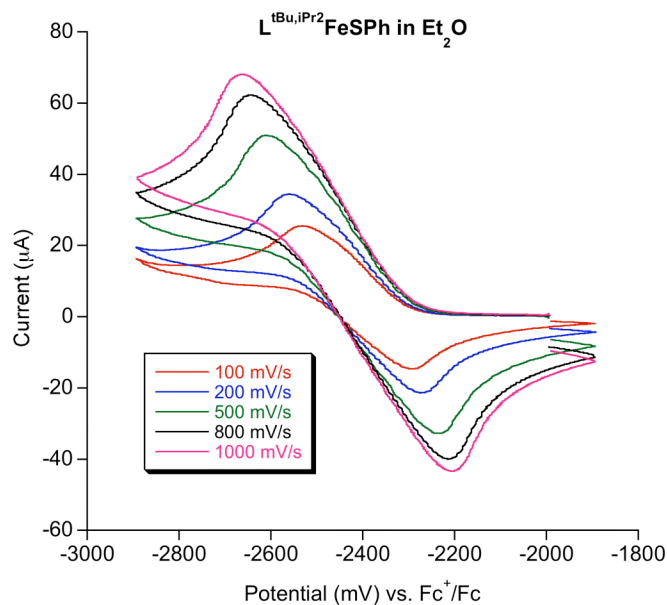

**Figure S24.** Voltammogram of  $L^{\text{tBu,iPr}_2}\text{Fe}(\text{SPhCF}_3)$  with corresponding  $E_{1/2}$  value of  $-2.40(2)$  V. Potential is referenced to the  $\text{Fc}^+/\text{Fc}$  couple. The sample consisted of 4 mM of  $L^{\text{tBu,iPr}_2}\text{Fe}(\text{SPhCF}_3)$  in  $\text{Et}_2\text{O}$  with 0.1 M  $\text{NBu}_4\text{BArF}$ .

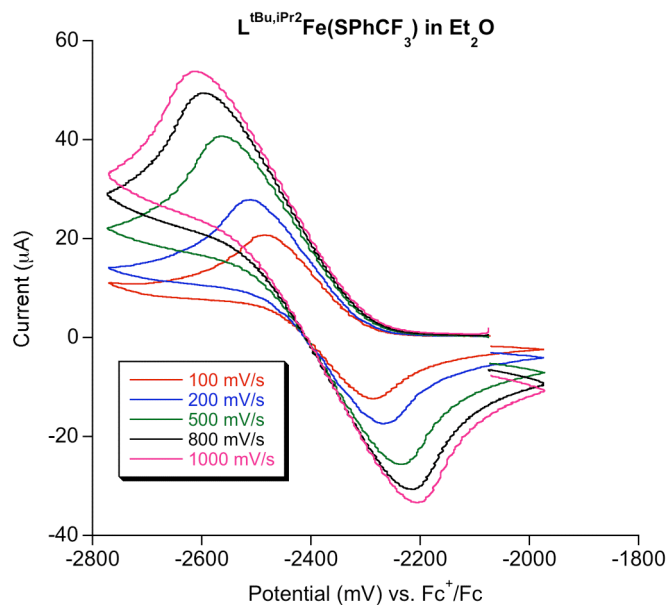

**Figure S25.** Voltammogram of  $L^{\text{tBu,iPr}_2}\text{Fe}(\text{OPh})$  with corresponding  $E_{1/2}$  value of  $-2.56(3)$  V. Potential is referenced to the  $\text{Fc}^+/\text{Fc}$  couple. The sample consisted of 4 mM of  $L^{\text{tBu,iPr}_2}\text{Fe}(\text{OPh})$  in  $\text{Et}_2\text{O}$  with 0.1 M  $\text{NBu}_4\text{BArF}$ .

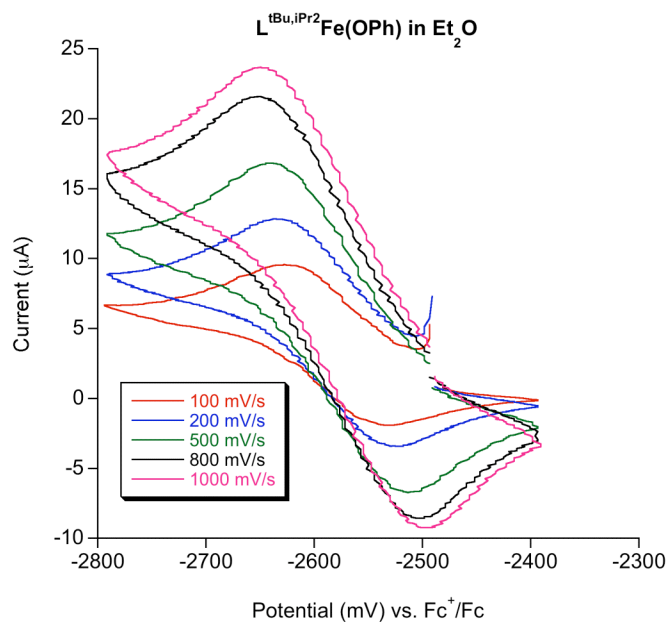

**Figure S26** CV of  $L^{\text{tBu,iPr}_2}\text{FeCl}$  sweeping in the reduction (left) and oxidation (right) direction. The reduction peak at  $-320$  mV is correlated with the oxidation peak at  $430$  mV. Potentials are referenced to the  $\text{Fc}^+/\text{Fc}$  couple.

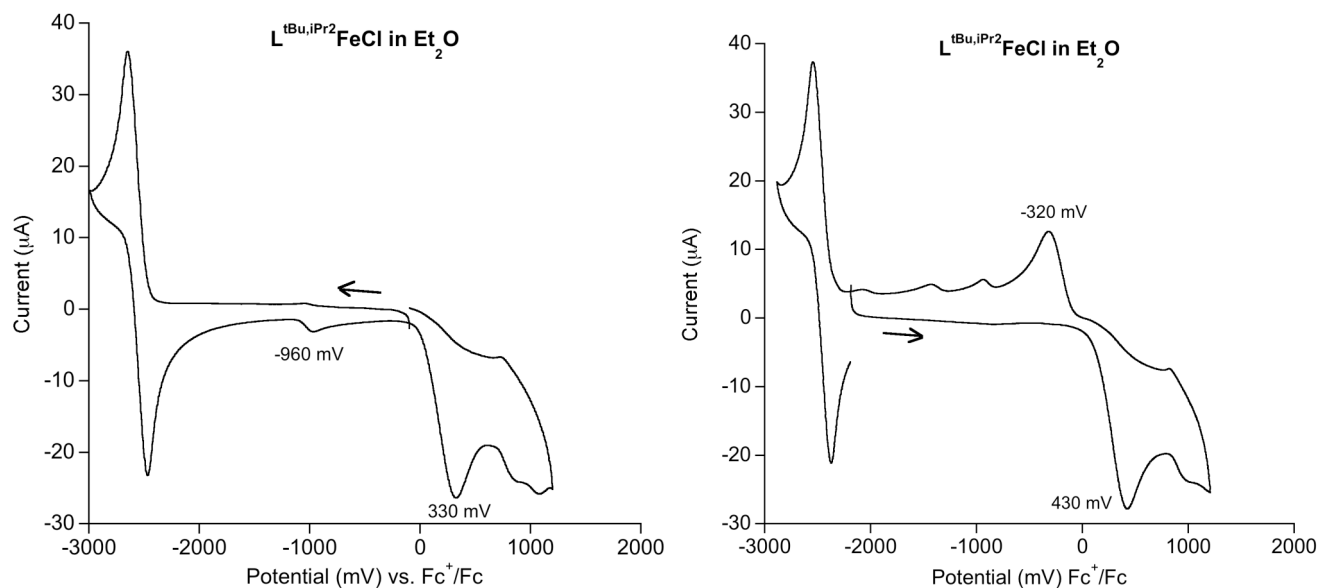

**Figure S27.** Voltammogram of  $L^{\text{tBu,iPr}_2}\text{Fe}(\text{SPh})(\text{NCMe})$  with corresponding  $E_{1/2}$  value of -2.30(6) V. Potential is referenced to the  $\text{Fc}^+/\text{Fc}$  couple. The sample consisted of 4 mM of  $L^{\text{tBu,iPr}_2}\text{Fe}(\text{SPh})$  in MeCN with 0.1 M  $\text{NBu}_4\text{PF}_6$ .

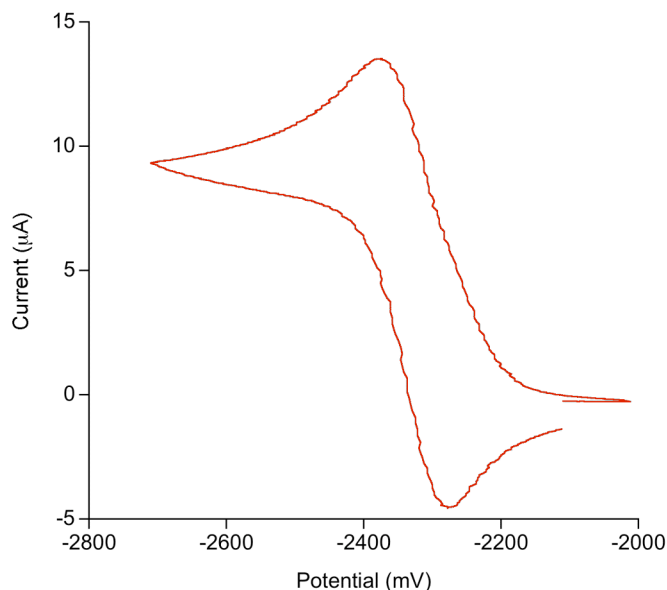

**Figure S28.** Voltammogram of  $L^{\text{tBu,iPr}_2}\text{Fe}(\text{SPhCF}_3)(\text{NCMe})$  with corresponding  $E_{1/2}$  value of -2.33(1) V. Potential is referenced to the  $\text{Fc}^+/\text{Fc}$  couple. The sample consisted of 4 mM of  $L^{\text{tBu,iPr}_2}\text{Fe}(\text{SPhCF}_3)$  in MeCN with 0.1 M  $\text{NBu}_4\text{PF}_6$ .

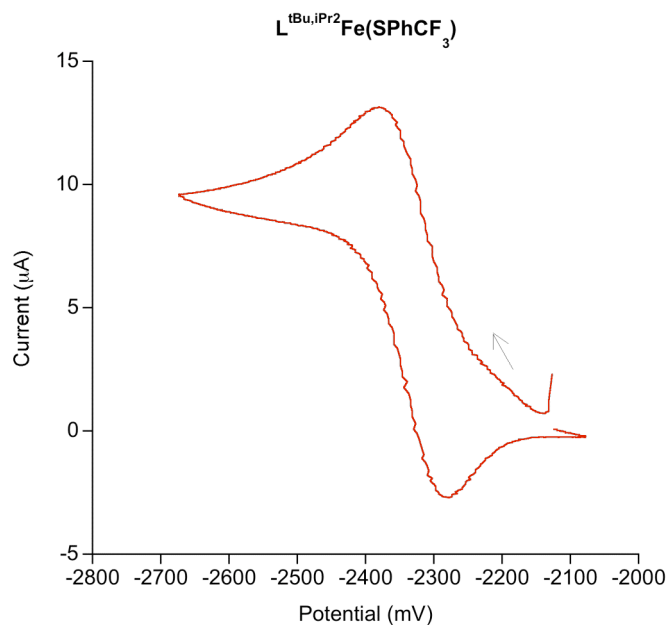

**Figure S29.** Voltammogram of  $L^{tBu,iPr2}Fe(OPh)(NCMe)$  with corresponding  $E_{1/2}$  value of -2.27(6) V. Potential is referenced to the  $Fc^+/Fc$  couple. The sample consisted of 4 mM of  $L^{tBu,iPr2}Fe(OPh)$  in MeCN with 0.1 M  $NBu_4PF_6$ .

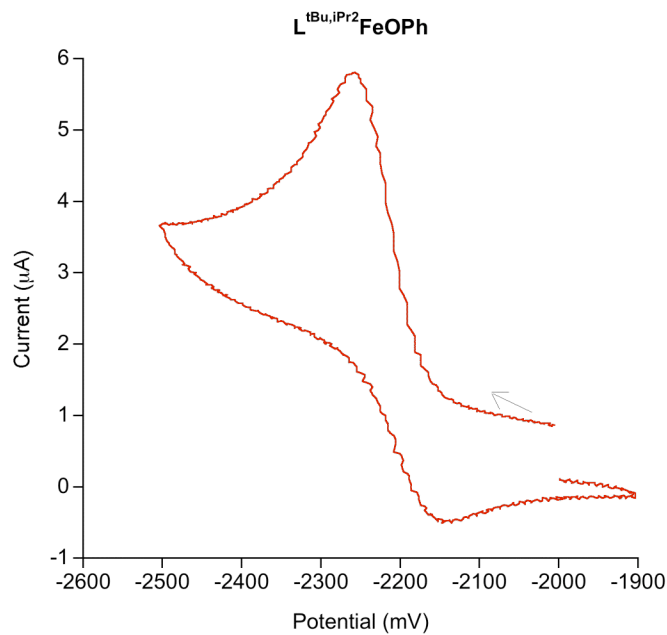

**Figure S30.** CV of  $L^{tBu,iPr2}FeCl(NCMe)$  sweeping in the reduction direction first. Potentials are referenced to the  $Fc^+/Fc$  couple.

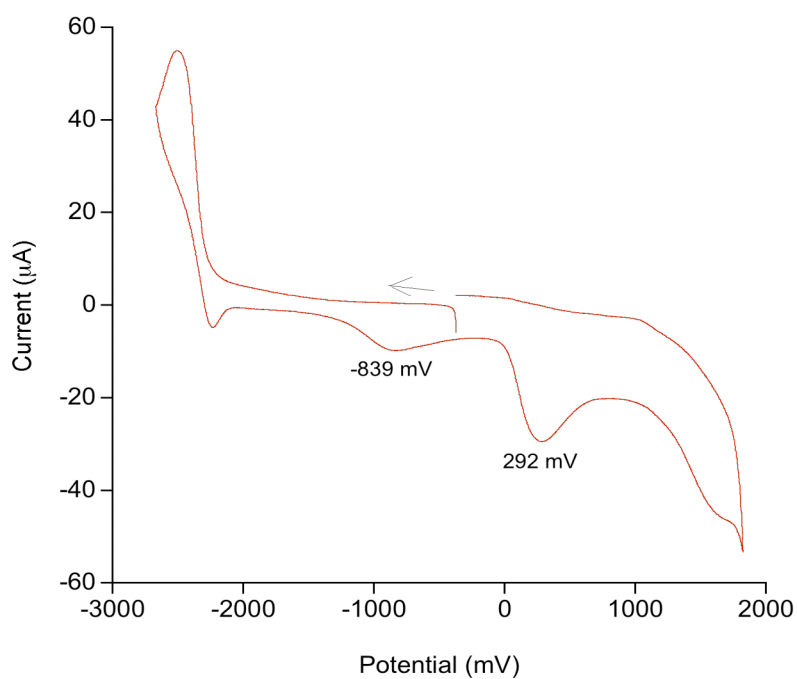



**Figure S31.** CV of  $L^{tBu,iPr2}FeCl(NCMe)$  sweeping in the oxidation direction first. An irreversible oxidation ( $E_{pa} = 12(9)$  mV) as well as reduction ( $E_{pc} = -67(3)$  mV) is observed. Potentials are referenced to the  $Fc^+/Fc$  couple.

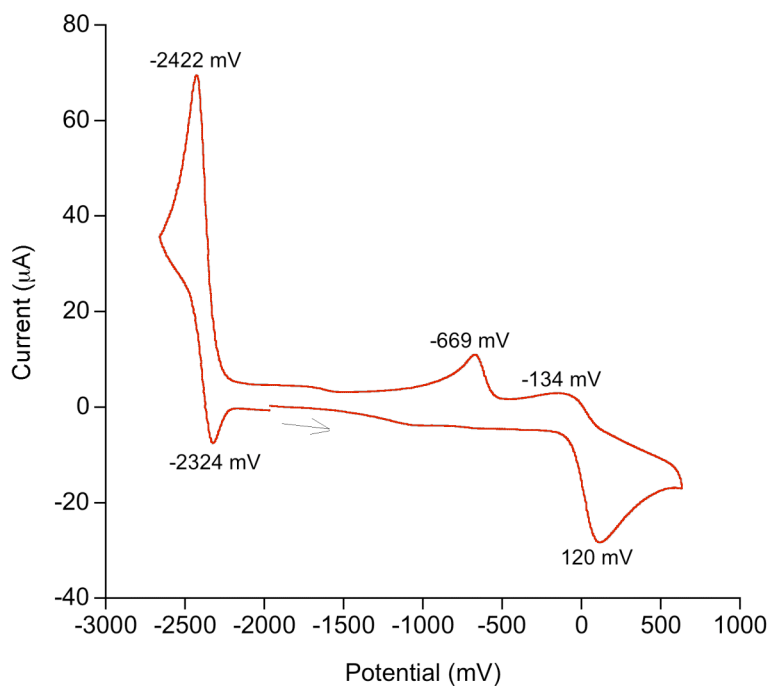

**Figure S32.** CV of the irreversible oxidation and reduction waves of  $L^{tBu,iPr2}FeCl(NCMe)$ . Potentials are referenced to the  $Fc^+/Fc$  couple.

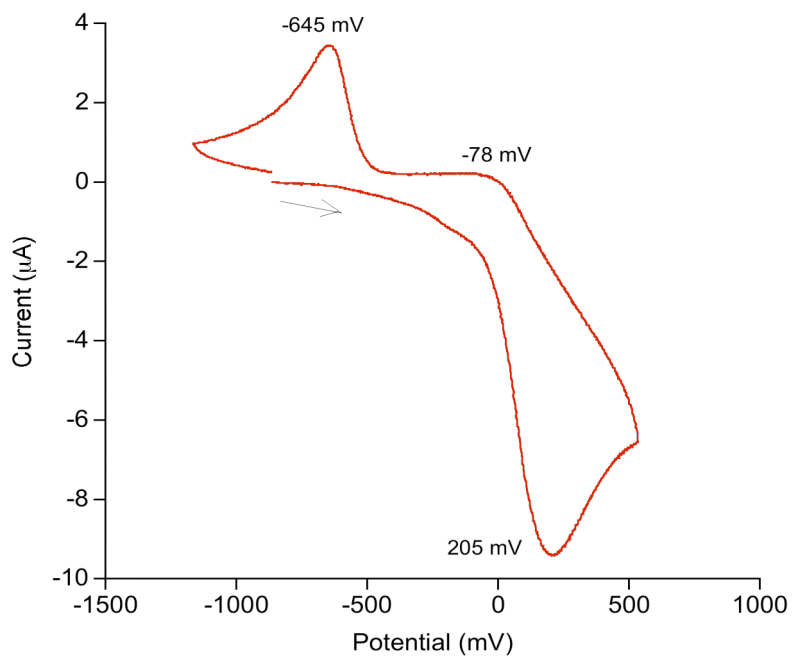

**Table S1.** List of compounds in the CSD used to determine solid and cone angles of PPh<sub>3</sub>. The metal of the complex is iron unless otherwise noted. “Coord. #” denotes coordination number of the metal center.

| <b>Ligand: PPh<sub>3</sub></b> |           |                           |                          |    |
|--------------------------------|-----------|---------------------------|--------------------------|----|
| Coord. #                       | Compound  | Solid Ang<br>( $\Omega$ ) | Cone Ang<br>( $\theta$ ) | P# |
| 4-coord.                       | DPPNFE    | 3.35                      | 124.34                   | 1  |
|                                | GATXOP    | 3.33                      | 123.96                   | 1  |
|                                |           | 3.33                      | 123.96                   | 1A |
|                                | GAWPUP    | 3.29                      | 123.07                   | 2  |
|                                |           | 3.39                      | 125.27                   | 3  |
|                                | JUQDAA    | 3.41                      | 125.53                   | 1  |
| OJAPOE                         | 3.42      | 125.77                    | 4                        |    |
| 6-coord.                       | CUBDOS    | 3.29                      | 123.15                   | 1  |
|                                | DASFAF    | 3.19                      | 120.94                   | 1  |
|                                | FEHBEA    | 3.31                      | 123.15                   | 2  |
|                                | GACLOL    | 3.32                      | 123.66                   | 2  |
|                                | REYFIL    | 3.29                      | 123.18                   | 1  |
|                                |           | 3.27                      | 122.72                   | 2  |
|                                | YAWGUY    | 3.27                      | 122.76                   | 1  |
| YEMYAR                         | 3.29      | 123.02                    | 1                        |    |
|                                | Avg.      | 3.32                      | 124                      |    |
|                                | Std. Dev. | 0.06                      | 1                        |    |

**Table S2.** List of compounds in the CSD used to determine solid and cone angles of THF.

| <b>Ligand: THF</b> |           |                        |                       |    |
|--------------------|-----------|------------------------|-----------------------|----|
| Coord. #           | Compound  | Solid Ang ( $\Omega$ ) | Cone Ang ( $\theta$ ) | O# |
| 4-coord.           | DABPUS    | 1.81                   | 89.22                 | 1  |
|                    | DABQAZ    | 1.79                   | 88.78                 | 1  |
|                    | GUWVUP    | 1.82                   | 89.45                 | 1  |
|                    |           | 1.82                   | 89.41                 | 1F |
|                    | JIXLEH    | 1.79                   | 88.58                 | 2  |
|                    |           | 1.79                   | 88.57                 | 2B |
|                    | MEZBOI    | 1.83                   | 89.72                 | 3  |
|                    |           | 1.80                   | 89.02                 | 4  |
|                    | VEMYOB    | 1.78                   | 88.54                 | 1  |
|                    | WORPIC    | 1.67                   | 85.58                 | 1  |
|                    |           | 1.67                   | 85.58                 | 1A |
|                    | YECRII    | 1.80                   | 88.98                 | 1  |
|                    |           | 1.79                   | 88.60                 | 2  |
|                    | YECRUU    | 1.81                   | 89.30                 | 1  |
| 1.79               |           | 88.76                  | 2                     |    |
| 5-coord.           | CIZFEWO1  | 1.87                   | 91.66                 | 1  |
|                    |           | 1.92                   | 92.13                 | 2  |
|                    |           | 1.81                   | 89.27                 | 3  |
|                    |           | 1.87                   | 90.66                 | 1A |
|                    |           | 1.92                   | 92.12                 | 2A |
|                    |           | 1.81                   | 89.27                 | 3A |
|                    | KAJTOE    | 1.88                   | 91.05                 | 1  |
|                    |           | 1.80                   | 91.03                 | 1E |
|                    | Avg.      | 1.81                   | 89                    |    |
|                    | Std. Dev. | 0.06                   | 2                     |    |

**Table S3.** List of compounds in the CSD used to determine solid and cone angles of MeCN.

| <b>Ligand: MeCN</b> |           |                           |                          |    |
|---------------------|-----------|---------------------------|--------------------------|----|
| Coord. #            | Compound  | Solid Ang<br>( $\Omega$ ) | Cone Ang<br>( $\theta$ ) | N# |
| 4-coord.            | DABRII    | 1.60                      | 83.68                    | 4  |
|                     | JEW TUB   | 1.60                      | 83.68                    | 5  |
|                     |           | 1.60                      | 83.74                    | 6  |
|                     | LEJQUN    | 1.60                      | 83.73                    | 1  |
|                     | LUGNOQ    | 1.60                      | 83.75                    | 1  |
|                     |           | 1.60                      | 83.68                    | 2  |
| NASKEY              | 1.60      | 83.68                     | 3                        |    |
| 5-coord.            | MAKCAD    | 1.60                      | 83.74                    | 3  |
|                     | YEPDUS    | 1.60                      | 83.64                    | 11 |
|                     | OFACEE    | 1.60                      | 83.71                    | 3  |
| 6-coord.            | AVINUO    | 1.60                      | 83.63                    | 6  |
|                     | EBORIW    | 1.60                      | 83.71                    | 5  |
|                     |           | 1.60                      | 83.67                    | 6  |
|                     | ESUQOY    | 1.60                      | 83.69                    | 5  |
|                     |           | 1.60                      | 83.66                    | 6  |
|                     | IROHOM    | 1.60                      | 83.72                    | 6  |
|                     |           | 1.60                      | 83.67                    | 12 |
|                     | NELGUG    | 1.60                      | 83.66                    | 5  |
|                     |           | 1.60                      | 83.66                    | 6  |
|                     | RIYTIC    | 1.60                      | 83.68                    | 5  |
| 1.60                |           | 83.65                     | 6                        |    |
|                     | Avg.      | 1.60                      | 83.69                    |    |
|                     | Std. Dev. | 0.00                      | 0.03                     |    |

**Table S4.** List of compounds in the CSD used to determine solid and cone angles of DMF. Holkc01 is  $L^{tBu,iPr_2}Fe(SPh)(DMF)$  (Figure 4c) reported in this paper. We used the ten complexes in the CSD with Fe-O-C and O-C-N angles closest to those in  $L^{tBu,iPr_2}Fe(SPh)(DMF)$ . The differences in angles from complexes in the database are shown; variations up to  $14^\circ$  did not affect the accuracy of the solid and cone angles (small standard deviation).

| Coord. #  | Compound       | Fe-O-C<br>( $^\circ$ ) | $\Delta$ Fe-O-C<br>( $^\circ$ ) | O-C-N ( $^\circ$ ) | $\Delta$ O-C-N ( $^\circ$ ) | Solid Ang<br>( $\Omega$ ) | Cone Ang<br>( $\theta$ ) | O#        |
|-----------|----------------|------------------------|---------------------------------|--------------------|-----------------------------|---------------------------|--------------------------|-----------|
| 4-coord.  | <b>HOLKC01</b> | <b>118.21</b>          | <b>0</b>                        | <b>124.84</b>      | <b>0</b>                    | <b>1.69</b>               | <b>86.18</b>             | <b>15</b> |
| 5-coord.  | JIWMIL         | 126.295                | 8.085                           | 123.916            | 0.924                       | 1.62                      | 84.15                    | 4         |
|           | QEKXIO         | 124.604                | 6.394                           | 124.375            | 0.465                       | 1.63                      | 84.46                    | 1         |
|           | GIGGIN         | 124.814                | 6.604                           | 124.943            | 0.103                       | 1.62                      | 84.30                    | 1         |
| 6-coord.  | DEZMIF         | 127.752                | 9.542                           | 126.414            | 1.574                       | 1.60                      | 83.49                    | 1         |
|           |                | 122.61                 | 4.4                             | 123.841            | 0.999                       | 1.64                      | 84.68                    | 2         |
|           |                | 124.329                | 6.119                           | 125.643            | 0.803                       | 1.63                      | 84.36                    | 3         |
|           | GAZGET         | 118.366                | 0.156                           | 125.493            | 0.653                       | 1.71                      | 86.55                    | 1         |
|           |                | 123.371                | 5.161                           | 128.987            | 4.147                       | 1.67                      | 85.49                    | 4         |
|           |                | 127.452                | 9.242                           | 128.674            | 3.834                       | 1.63                      | 84.37                    | 2         |
|           |                | 121.441                | 3.231                           | 127.51             | 2.67                        | 1.68                      | 85.91                    | 5         |
|           |                | 132.071                | 13.861                          | 121.519            | 3.321                       | 1.58                      | 83.05                    | 3         |
|           |                | 129.566                | 11.356                          | 125.658            | 0.818                       | 1.60                      | 83.69                    | 6         |
|           |                | 127.944                | 9.734                           | 123.629            | 1.211                       | 1.61                      | 83.92                    | 9         |
|           | JOHVIL         | 123.173                | 4.963                           | 120.805            | 4.035                       | 1.64                      | 84.73                    | 10        |
|           |                | 116.953                | 1.257                           | 125.936            | 1.096                       | 1.70                      | 86.26                    | 1         |
|           | NADTAN         | 132.766                | 14.556                          | 123.065            | 1.775                       | 1.56                      | 82.65                    | 1         |
|           |                | 126.309                | 8.099                           | 124.523            | 0.317                       | 1.62                      | 84.05                    | 1         |
|           |                | 132.732                | 14.522                          | 122.211            | 2.629                       | 1.57                      | 82.67                    | 1         |
|           |                | 125.518                | 7.308                           | 124.144            | 0.696                       | 1.63                      | 84.33                    | 1         |
|           |                | 124.739                | 6.529                           | 124.045            | 0.795                       | 1.63                      | 84.43                    | 1         |
|           | QEZGUY         | 129.333                | 11.123                          | 123.66             | 1.18                        | 1.59                      | 83.40                    | 1         |
|           |                | 125.262                | 7.052                           | 124.655            | 0.185                       | 1.63                      | 84.33                    | 2         |
|           | WODKIJ         | 117.23                 | 0.98                            | 124.455            | 0.385                       | 1.67                      | 85.57                    | 6         |
|           | CIDLUX         | 126.042                | 7.832                           | 125.534            | 0.694                       | 1.61                      | 84.03                    | 10        |
|           |                | 129.682                | 11.472                          | 122.443            | 2.397                       | 1.58                      | 83.17                    | 11        |
|           | MIJKOG         | 128.207                | 9.997                           | 129.494            | 4.654                       | 1.60                      | 83.74                    | 18        |
| 123.958   |                | 5.748                  | 129.279                         | 4.439              | 1.64                        | 84.70                     | 19                       |           |
| 121.468   |                | 3.258                  | 127.766                         | 2.926              | 1.60                        | 85.21                     | 14                       |           |
| 131.329   |                | 13.119                 | 133.167                         | 8.327              | 1.74                        | 87.28                     | 15                       |           |
| 121.969   |                | 3.759                  | 126.884                         | 2.044              | 1.70                        | 86.38                     | 16                       |           |
| Avg.      |                |                        |                                 |                    |                             | 1.63                      | 85                       |           |
| Std. Dev. |                |                        |                                 |                    |                             | 0.04                      | 1                        |           |

**Table S5.** List of compounds in the CSD used to determine solid and cone angles of 2-picoline. Only two compounds with 2-picoline as a ligand were found. Therefore, cobalt and nickel complexes were also used to calculate the solid and cone angle of 2-picoline.

| <b>Ligand: 2-Picoline</b> |           |                           |                          |    |
|---------------------------|-----------|---------------------------|--------------------------|----|
| Coord. #                  | Compound  | Solid Ang<br>( $\Omega$ ) | Cone Ang<br>( $\theta$ ) | N# |
| Fe, 6-Coord               | OMAJUH    | 2.39                      | 103.44                   | 1  |
|                           |           | 2.39                      | 103.43                   | 1A |
|                           | QANNAU    | 2.33                      | 102.10                   | 1  |
|                           |           | 2.37                      | 102.96                   | 2  |
|                           |           | 2.36                      | 102.66                   | 3  |
|                           |           | 2.34                      | 102.37                   | 4  |
| Co, 4-Coord               | WUGTOH    | 2.40                      | 103.67                   | 2  |
| Ni, 6-Coord               | KUHBOE    | 2.34                      | 102.22                   | 1  |
|                           |           | 2.34                      | 102.24                   | 1A |
|                           | Avg.      | 2.36                      | 102.8                    |    |
|                           | Std. Dev. | 0.03                      | 0.6                      |    |

**Table S6.** List of compounds in the CSD used to determine solid and cone angles of pyridine.

| <b>Ligand: Pyridine</b> |          |                           |                          |       |
|-------------------------|----------|---------------------------|--------------------------|-------|
| Coord. #                | Compound | Solid Ang<br>( $\Omega$ ) | Cone Ang<br>( $\theta$ ) | N#    |
| 4-Coord.                | DAWKAO   | 1.89                      | 91.39                    | 1     |
|                         |          | 1.89                      | 91.36                    | 2     |
|                         | HEVLAW   | 1.89                      | 91.23                    | 1     |
|                         |          | KAHJUZ                    | 1.89                     | 91.39 |
|                         | 1.89     |                           | 91.36                    | 4     |
|                         | MEGHUC   | 1.90                      | 91.60                    | 3     |
|                         |          | POMZOG                    | 1.94                     | 92.53 |
|                         | 1.95     |                           | 92.85                    | 2     |
|                         | QANMOH   | 1.90                      | 91.43                    | 1     |
|                         |          | 1.89                      | 91.40                    | 2     |
|                         | TENHOJ   | 1.90                      | 91.43                    | 1     |
|                         |          | 1.90                      | 91.43                    | 1B    |
| 5-Coord.                | QEVCEA   | 1.90                      | 91.53                    | 1     |
|                         | RORKUE   | 1.92                      | 92.03                    | 5     |
|                         | SELSEI   | 1.89                      | 91.36                    | 7     |
|                         | Avg.     | 1.90                      | 91.6                     |       |
|                         | Std.Dev. | 0.02                      | 0.5                      |       |

**Table S7.** List of compounds in the CSD used to determine solid and cone angles of CN<sup>t</sup>Bu. Holkc02 is L<sup>t</sup>Bu,<sup>i</sup>Pr<sub>2</sub>Fe(SPh)(CN<sup>t</sup>Bu) (Figure 4a) reported in this paper. We used the ten complexes in the CSD with Fe-C-N and C-N-C angles closest to those in L<sup>t</sup>Bu,<sup>i</sup>Pr<sub>2</sub>Fe(SPh)(CN<sup>t</sup>Bu). The differences in angles from complexes in the database are shown; variations up to 12° did not affect the accuracy of the solid and cone angles (small standard deviation).

| <b>Ligand: CN<sup>t</sup>Bu</b> |                |               |                 |               |                |                  |                 |     |
|---------------------------------|----------------|---------------|-----------------|---------------|----------------|------------------|-----------------|-----|
| Coord. #                        | Compound       | Fe-C-N<br>(°) | Δ Fe-C-N<br>(°) | C-N-C<br>(°)  | Δ C-N-C<br>(°) | Solid Ang<br>(Ω) | Cone Ang<br>(θ) | C#  |
| 4-coord.                        | <b>HOLKC02</b> | <b>165.46</b> | <b>0</b>        | <b>173.58</b> | <b>0</b>       | <b>1.66</b>      | <b>85.30</b>    | C15 |
|                                 | WAHGIV         | 174.576       | 9.116           | 165.018       | 8.562          | 1.65             | 84.92           | C21 |
|                                 |                | 177.268       | 11.808          | 176.33        | 2.75           | 1.65             | 84.89           | C26 |
|                                 | YACJIW         | 168.668       | 3.208           | 176.856       | 3.276          | 1.65             | 84.95           | C27 |
|                                 |                | 168.879       | 3.419           | 173.124       | 0.456          | 1.65             | 84.92           | C21 |
| 5-coord.                        | PUSYAD         | 172.582       | 7.122           | 163.945       | 9.635          | 1.65             | 85.06           | C1  |
|                                 |                | 173.147       | 7.687           | 165.925       | 7.655          | 1.65             | 84.91           | C2  |
|                                 |                | 176.203       | 10.743          | 173.422       | 0.158          | 1.65             | 84.89           | C3  |
|                                 |                | 175.944       | 10.484          | 168.234       | 5.346          | 1.65             | 84.94           | C6  |
|                                 |                | 175.981       | 10.521          | 168.843       | 4.737          | 1.65             | 84.89           | C5  |
|                                 | SIMVEP         | 177.266       | 11.806          | 164.159       | 9.421          | 1.65             | 84.98           | C1  |
|                                 |                | 171.762       | 6.302           | 165.729       | 7.851          | 1.65             | 84.91           | C6  |
|                                 |                | 173.674       | 8.214           | 163.326       | 10.254         | 1.65             | 84.91           | C11 |
| 6-coord.                        | ENIXEE         | 173.852       | 8.392           | 176.222       | 2.642          | 1.65             | 84.93           | C15 |
|                                 |                | 174.763       | 9.303           | 177.233       | 3.653          | 1.65             | 84.98           | C23 |
|                                 |                | 172.943       | 7.483           | 177.484       | 3.904          | 1.65             | 84.94           | C31 |
|                                 |                | 176.645       | 11.185          | 172.789       | 0.791          | 1.65             | 84.94           | C36 |
|                                 | FAJLAE         | 169.91        | 4.45            | 162.023       | 11.557         | 1.69             | 86.14           | C36 |
|                                 |                | 174.124       | 8.664           | 174.126       | 0.546          | 1.65             | 84.95           | C84 |
|                                 |                | 166.334       | 0.874           | 166.585       | 6.995          | 1.69             | 86.00           | C44 |
|                                 |                | 168.263       | 2.803           | 166.328       | 7.252          | 1.68             | 85.81           | C89 |
|                                 | GOTFIE         | 177.651       | 12.191          | 172.737       | 0.843          | 1.65             | 84.89           | C3  |
|                                 | KEWNIK         | 177.711       | 12.251          | 177.333       | 3.753          | 1.65             | 84.91           | C1  |
|                                 |                | 179.449       | 13.989          | 174.898       | 1.318          | 1.65             | 84.88           | C10 |
|                                 |                | 175.959       | 10.499          | 172.97        | 0.61           | 1.65             | 84.92           | C15 |
|                                 |                | 176.92        | 11.46           | 174.407       | 0.827          | 1.65             | 84.92           | C20 |
|                                 | PAKKOC         | 167.539       | 2.079           | 167.922       | 5.658          | 1.65             | 84.96           | C27 |
|                                 |                | 171.938       | 6.478           | 175.371       | 1.791          | 1.66             | 85.25           | C32 |
|                                 | QATRAE         | 171.539       | 6.079           | 169.462       | 4.118          | 1.66             | 84.96           | C17 |
|                                 | VUPFAN         | 173.815       | 8.355           | 176.193       | 2.613          | 1.65             | 84.94           | C23 |
|                                 |                | 176.409       | 10.949          | 178.162       | 4.582          | 1.65             | 84.90           | C28 |
|                                 | WAHBOW         | 172.343       | 6.883           | 173.252       | 0.328          | 1.65             | 84.93           | C20 |
|                                 |                | 170.714       | 5.254           | 170.544       | 3.036          | 1.65             | 85.04           | C25 |

|  |        |         |        |         |       |      |       |     |
|--|--------|---------|--------|---------|-------|------|-------|-----|
|  |        | 171.616 | 6.156  | 166.735 | 6.845 | 1.65 | 85.08 | C30 |
|  |        | 174.971 | 9.511  | 167.214 | 6.366 | 1.65 | 84.89 | C54 |
|  |        | 174.399 | 8.939  | 174.135 | 0.555 | 1.65 | 84.89 | C59 |
|  |        | 177.04  | 11.58  | 167.737 | 5.843 | 1.65 | 84.85 | C64 |
|  |        | 177.343 | 11.883 | 167.803 | 5.777 | 1.65 | 84.95 | C1  |
|  | YELVOA | 175.084 | 9.624  | 173.46  | 0.12  | 1.65 | 84.98 | C3  |
|  |        | 174.383 | 8.923  | 162.99  | 10.59 | 1.65 | 84.88 | C5  |
|  |        | 178.516 | 13.056 | 164.124 | 9.456 | 1.65 | 84.92 | C6  |
|  |        | 178.49  | 13.03  | 171.886 | 1.694 | 1.65 | 84.89 | C5  |
|  | YIBLUR | 177.257 | 11.797 | 176.064 | 2.484 | 1.65 | 85.00 | C13 |
|  |        |         |        |         | Avg.  | 1.65 | 85.0  |     |
|  |        |         |        |         | Std.  |      |       |     |
|  |        |         |        |         | Dev.  | 0.01 | 0.3   |     |



**Figure S12.**  $^1\text{H}$  NMR spectrum of  $\text{L}^{\text{tBu},\text{iPr}_2}\text{Fe}(\text{SPh})(\text{CN}^{\text{tBu}})$  in  $\text{C}_6\text{D}_6$ .

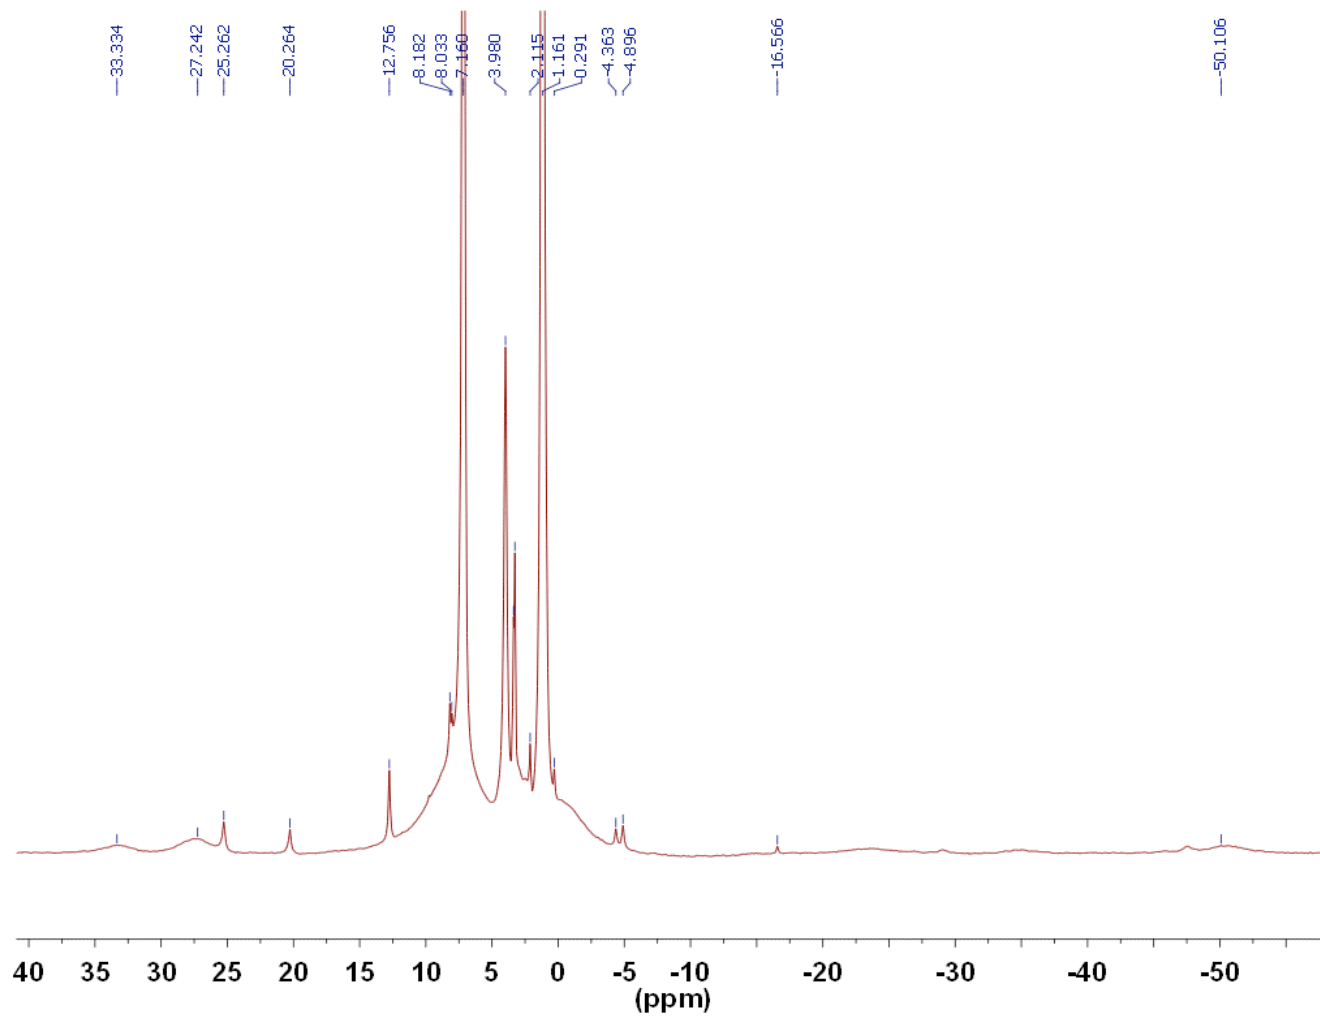

**Figure S13.**  $^1\text{H}$  NMR spectrum of  $\text{L}^{\text{tBu,iPr}_2}\text{Fe}(\text{SPh})(\text{DMF})$  in  $\text{C}_6\text{D}_6$ .

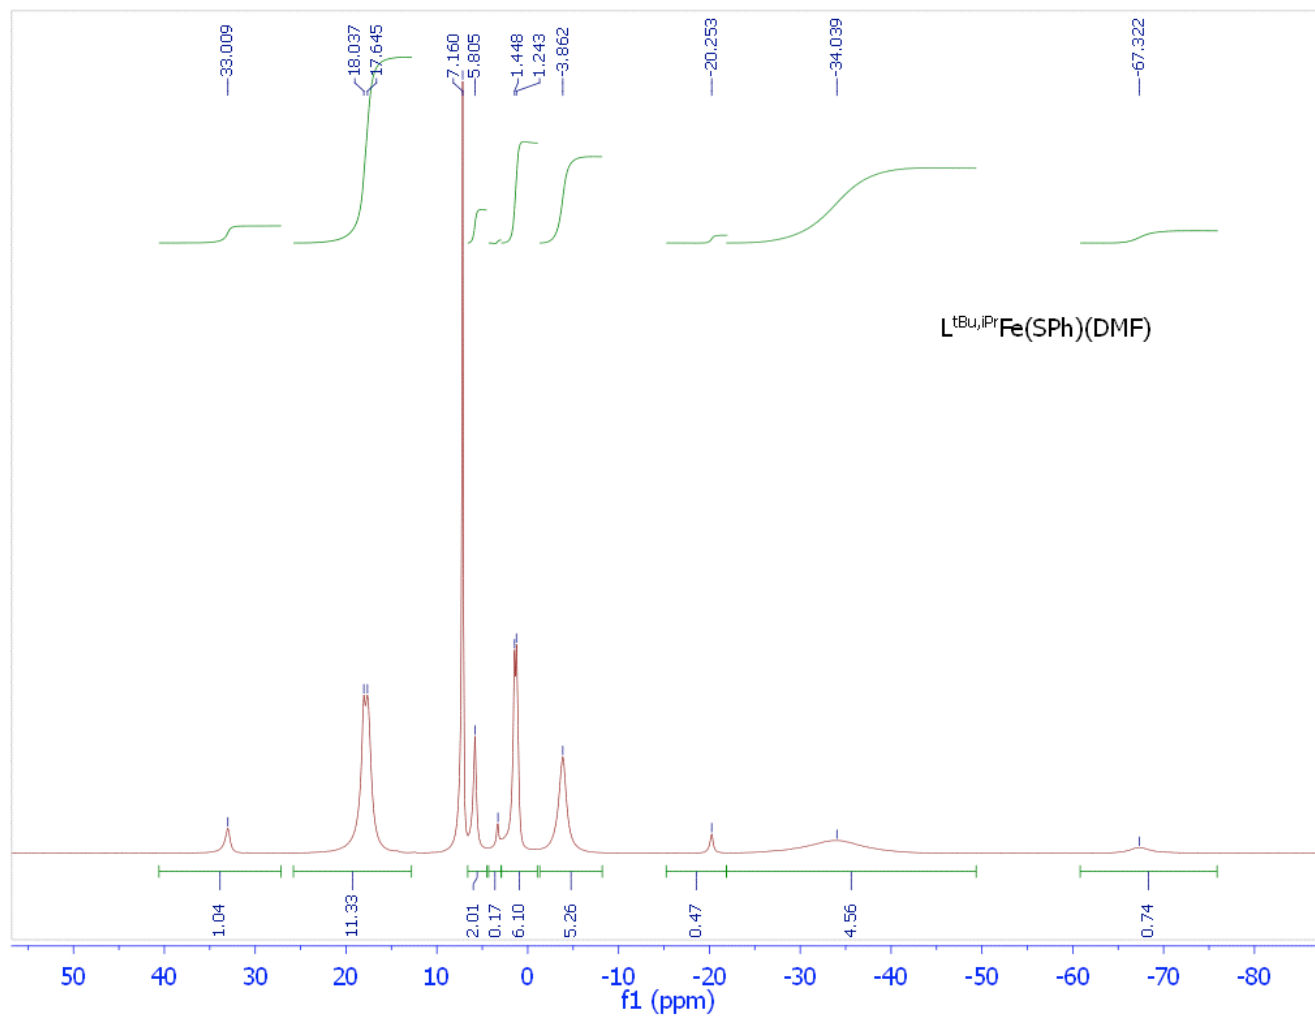

**Figure S14.**  $^1\text{H}$  NMR spectrum of  $\text{L}^{\text{tBu,iPr}_2}\text{Fe}(\text{SPh})(\text{MeIm})$  in  $\text{C}_6\text{D}_6$ .

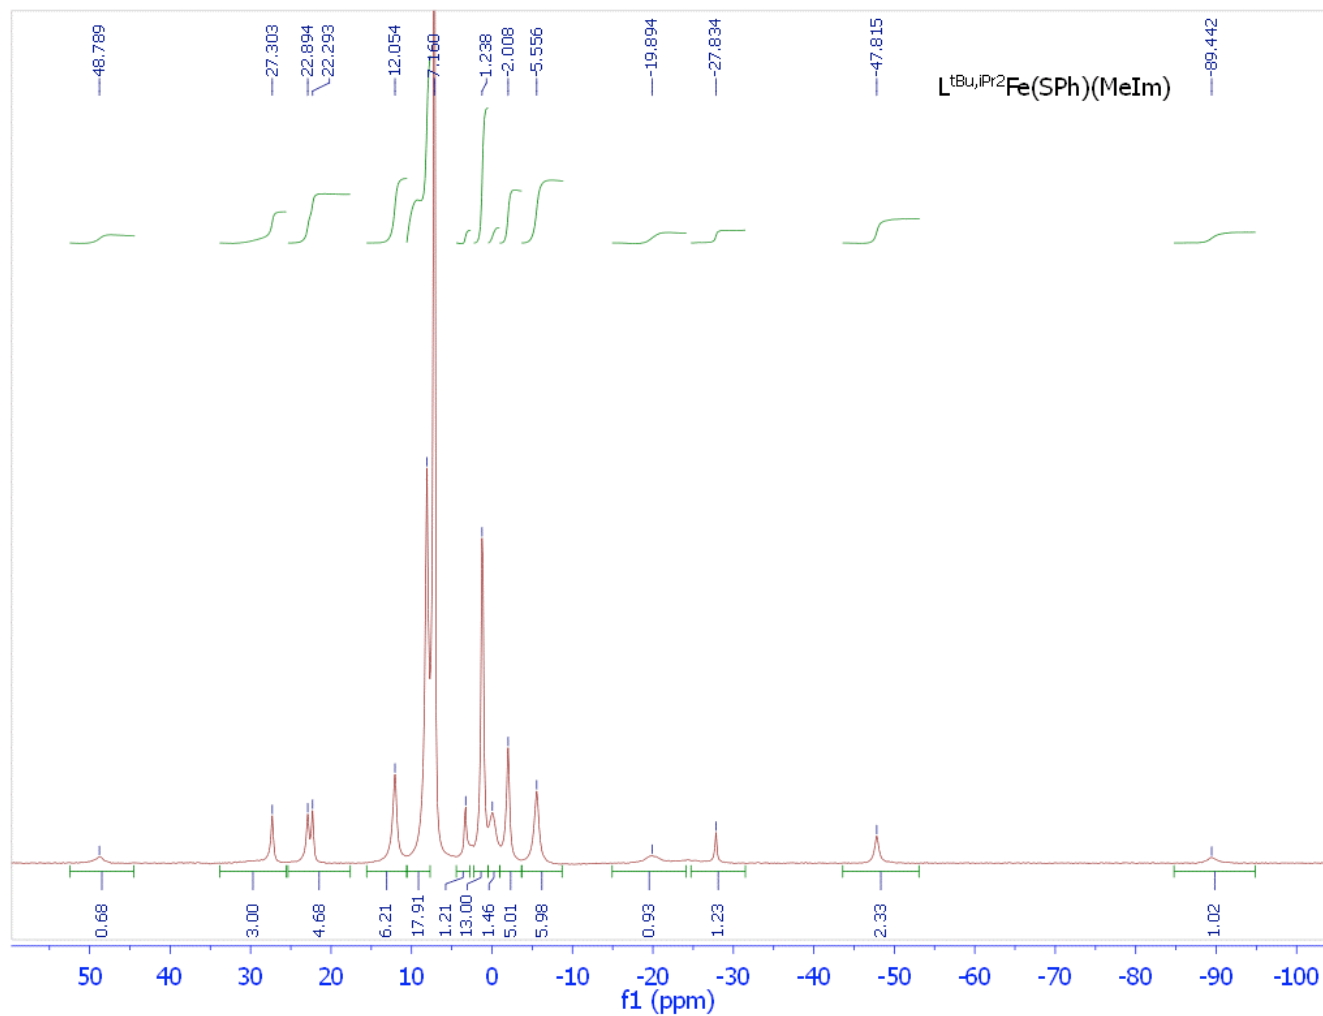

Supplement: NIHMS157936-supplement-2.pdf [file NIHMS157936-supplement-2.pdf]
